# Supplementary material for: Motivational Differences among Traditional and Nontraditional Students Enrolled in Metropolitan Universities
Source: Royal Society of Chemistry journal article supplement (doi:10.1039/d2ra02942a), 2000-01-01
Supplement: d2ra02942a1.pdf [file d2ra02942a1.pdf]

**3D-printed bioactive ceramic scaffolds with MoSe<sub>2</sub> nanocrystals as photothermal agents for bone tumor therapy**

Xin Zhang,<sup>†a</sup> Yingzhi Li,<sup>b</sup> Xiaoming Dong,<sup>b</sup> Hao Wang,<sup>b</sup> Bo Chen,<sup>b</sup> Ruiyan Li,<sup>b\*</sup>  
Yanguo Qin,<sup>b\*</sup> Orest Ivasishin,<sup>a,c</sup>

a Key Laboratory of Automobile Materials of MOE, Department of Materials Science and Engineering, International Center of Future Science, Jilin University, Changchun 130012, China.

b Department of Orthopedics, The Second Hospital of Jilin University, Jilin University, Changchun 130041, PR China

c G. V. Kurdyumov Institute for Metal Physics, Kyiv, Ukraine

\*Corresponding author

Ruiyan Li, [liyandii@msn.cn](mailto:liyandii@msn.cn)

Yanguo Qin, [qinyg@jlu.edu.cn](mailto:qinyg@jlu.edu.cn)

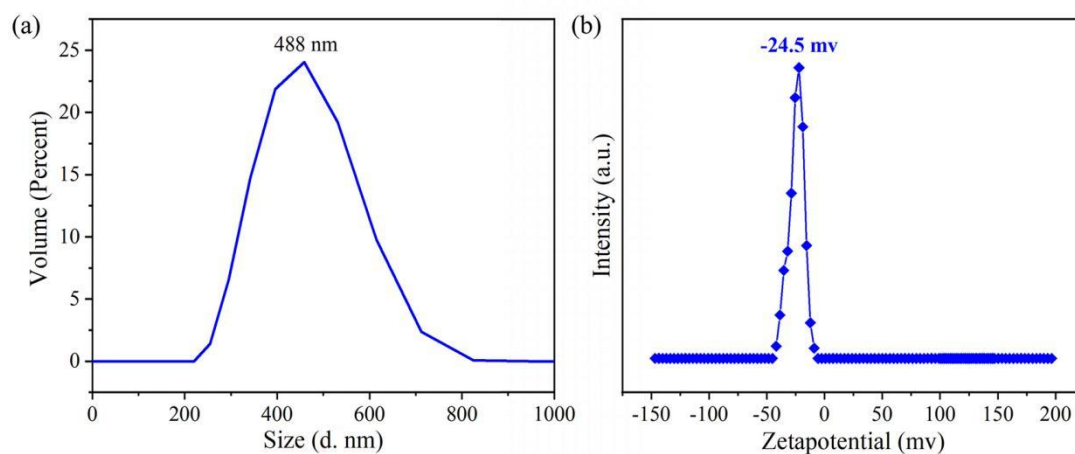

**Fig. S1** Particle size and Zeta potential of MoSe<sub>2</sub> nanocrystals in aqueous solution.

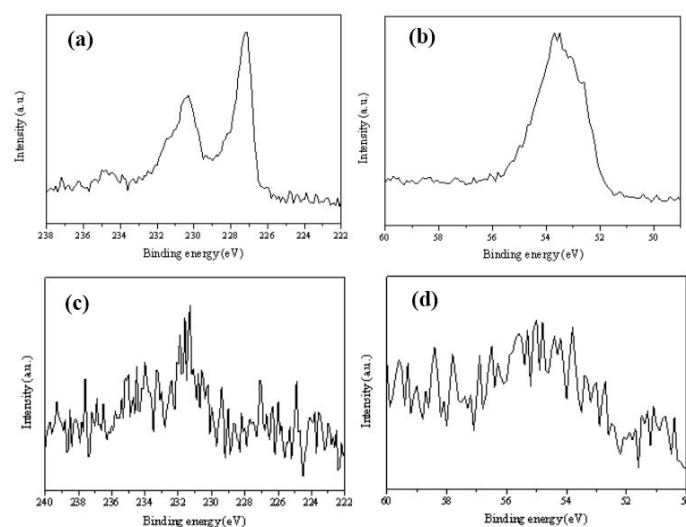

**Fig. S2** XPS characteristic spectra for (a) Mo and (b) Se electrons of MoSe<sub>2</sub> nanoparticles, and (c) Mo and (d) Se electrons of 12MS-BRT scaffolds, which demonstrated valence state of +4 and -2 for Mo and Se in the newly formed MoSe<sub>2</sub> layer on the scaffolds.

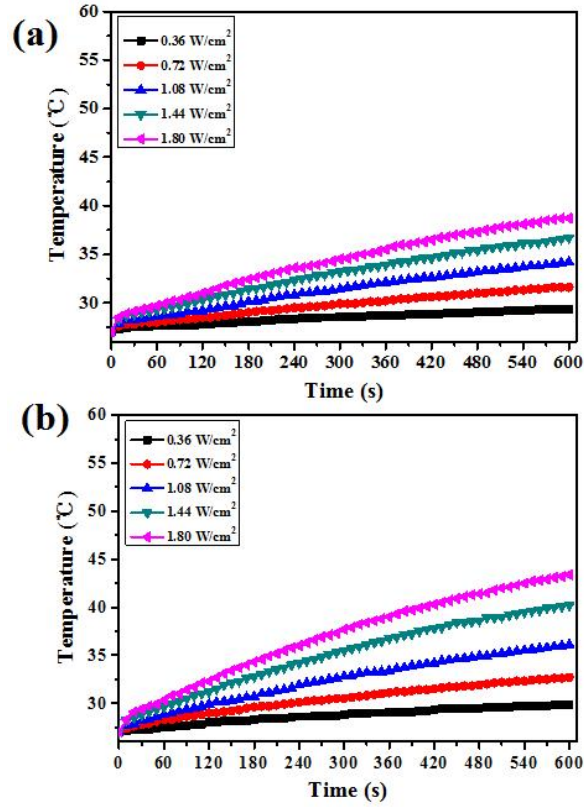

**Fig. S3** Temperature rise curves of water (a) and BRT scaffolds (b) at different laser power densities.

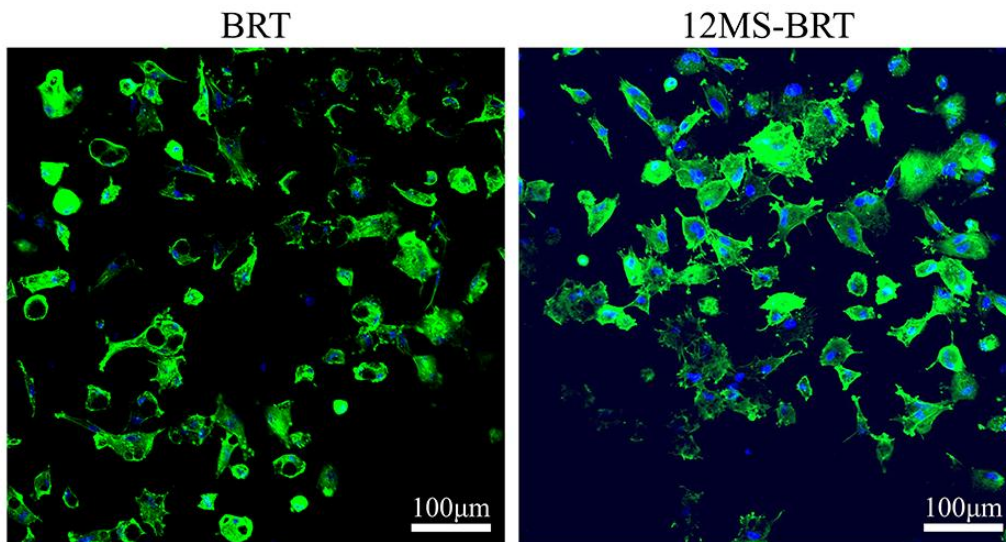

**Fig. S4** CLSM images of F-actin and nuclei of BMSCs on the BRT and 12MS-BRT samples.

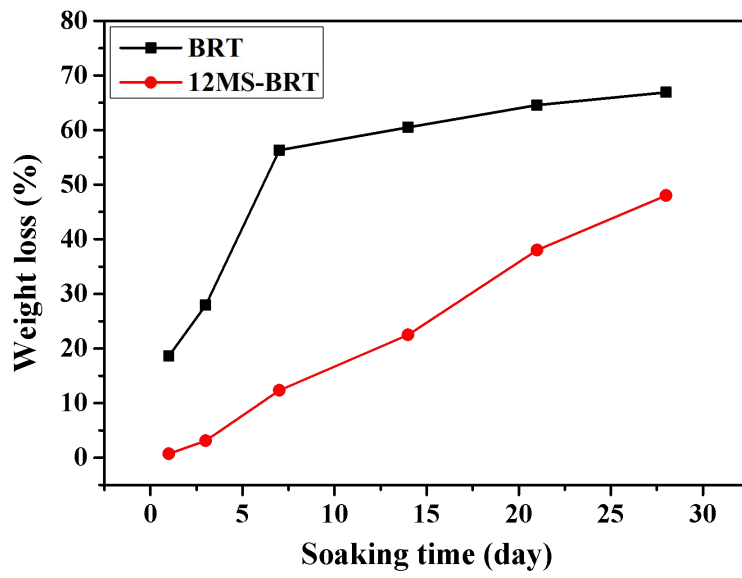

**Fig. S5** Weight loss of BRT and 12MS-BRT scaffolds after soaking in Tris-HCl solution at 37 C for 28 days.

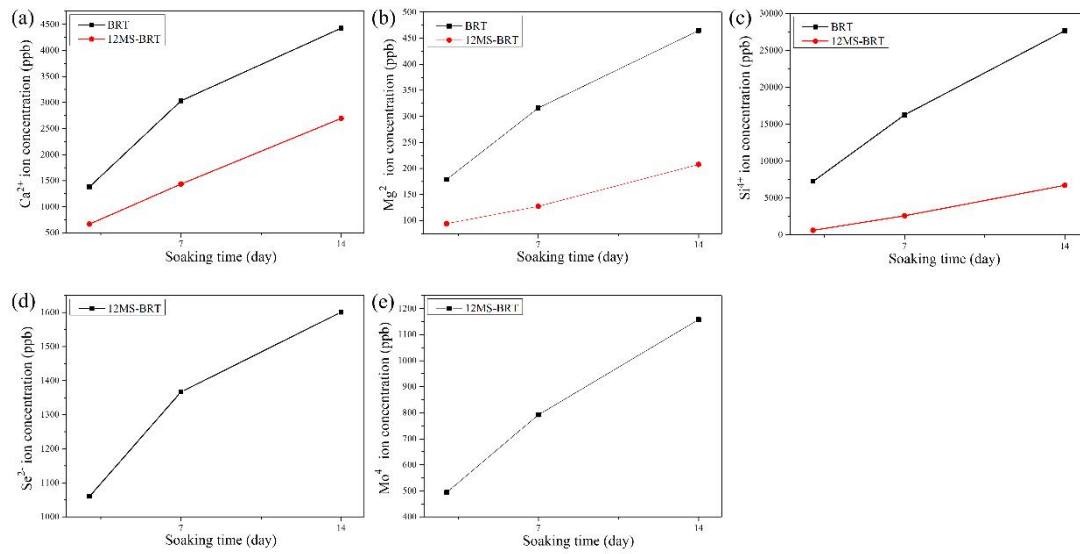

**Fig. S6** The released  $Ca^{2+}$ (a),  $Mg^{2+}$ (b),  $Si^{4+}$ (c),  $Se^{2-}$ (d) and  $Mo^{4+}$ (e) ions in the Tris-HCl solutions at each time point were quantified by inductively coupled plasma-atomic emission spectrometry.

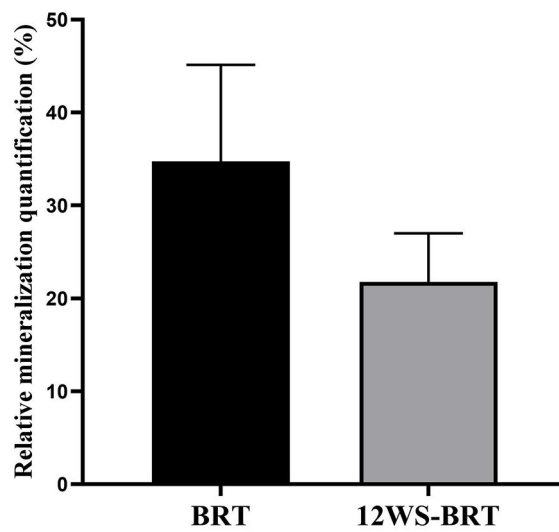

**Fig. S7** The relative mineralization quantification of different groups at 14 days.
